# Supplementary material for: Rational design of 3D net-like carbon based Mn3O4 anode materials with enhanced lithium storage performance
Source: Royal Society of Chemistry journal article supplement (doi:10.1039/d2nj01618d), 2022-01-01
Supplement: d2nj01618d1.pdf [file d2nj01618d1.pdf]

## Rational design of a 3D net-like carbon based $Mn_3O_4$ anode material with an enhanced lithium storage performance

Xue Li <sup>a</sup>, Wence Yue <sup>a</sup>, Wen biao Li <sup>a</sup>, Jie Zhao <sup>a</sup>, Yu jiao Zhang <sup>a</sup>, Yibo Gao <sup>a</sup>, Ning Gao <sup>a</sup>, Dan Feng <sup>a</sup>, Bin Wu <sup>b, c\*</sup>, Bao Wang <sup>a, d\*</sup>

<sup>a</sup> State Key Laboratory of Biochemical Engineering, Institute of Process Engineering, Chinese Academy of Science, Beijing, 100190, P. R. China

<sup>b</sup> Young Investigator Group Nanoscale Solid-Liquid Interfaces, Helmholtz-Zentrum Berlin für Materialien und Energie GmbH, Albert-Einstein-Straße 15, 12489 Berlin, Germany

<sup>c</sup> Institute of Physics, Humboldt University Berlin, Newton-Straße 15, 12489 Berlin, Germany

<sup>d</sup> College of Chemistry and Chemical Engineering, University of Chinese Academy of Sciences, Beijing, 100000, P. R. China

\* Corresponding authors.

Email address: bin.wu@helmholtz-berlin.de (B. Wu), baowang@ipe.ac.cn (B. Wang).

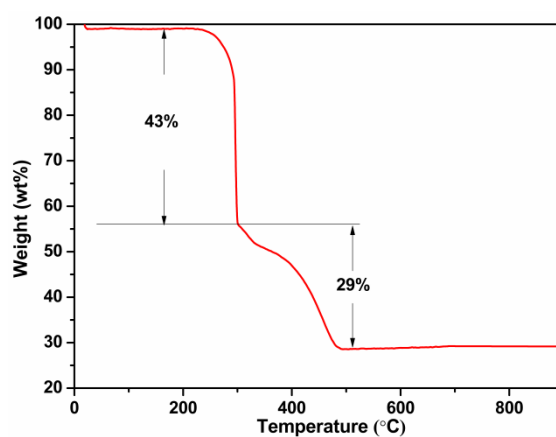

Fig. S1. TG curve of  $Mn_3O_4/CP$  composite.

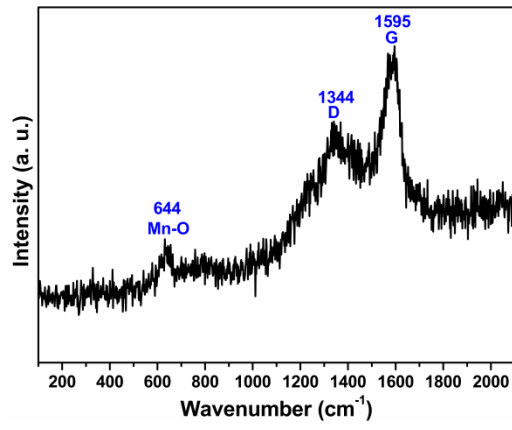

Fig. S2. Raman spectrum of Mn<sub>3</sub>O<sub>4</sub>/CP composite.
